# Supplementary material
Source: publisher figshare collection journal article supplement (https://acs.figshare.com/ndownloader/files/8669968)
Supplement: Supplementary file 1 [file 8669968]

## **SUPPORTING INFORMATION**

# **Design of Modular Protein Tags for Orthogonal Covalent Bond Formation at Specific DNA Sequences**

Thang Minh Nguyen, Eiji Nakata, Masayuki Saimura, Huyen Dinh, and Takashi  
Morii\*

Institute of Advanced Energy, Kyoto University, Uji, Kyoto 611-0011, Japan.

\*To whom correspondence should be addressed:

Prof. Takashi Morii

Tel.: +81 774-38-3515

Fax: +81 774-38-3516

E-mail: t-morii@iae.kyoto-u.ac.jp

## Table of contents

|                                                                                                                                                          |     |
|----------------------------------------------------------------------------------------------------------------------------------------------------------|-----|
| <b>Scheme S1.</b> Coupled enzyme assay for study the activity of XK derivatives .....                                                                    | S3  |
| <b>Table S1.</b> Equilibrium disassociation constants for the complexes of modular adaptors with ODNs.....                                               | S3  |
| <b>Table S2.</b> Kinetic parameters for the cross-linking reaction between 5'- <sup>32</sup> P-end-labeled ODN derivatives and modular adaptors.....     | S3  |
| <b>Table S3.</b> The staple strands including zif268 and AZP4 binding sites with substrates modified T.....                                              | S4  |
| <b>Table S4.</b> Total numbers and yields of the DNA scaffolds assembled with the modular adaptors or modular adaptor fused enzymes analyzed by AFM..... | S4  |
| <b>Table S5.</b> Kinetic parameters for XK, AC-XK and AH-XK for the phosphorylation of xylulose.....                                                     | S4  |
| <b>Table S6.</b> Quantitation of the cofactors by HPLC.....                                                                                              | S5  |
| <b>Table S7.</b> Amino acid sequence and molecular weight of modular adaptor derivatives.....                                                            | S6  |
| <b>Figure S1.</b> Possible models for the complexes.....                                                                                                 | S7  |
| <b>Figure S2.</b> SDS-PAGE analysis of purified modular adaptors and modular adaptor-fused enzymes.....                                                  | S7  |
| <b>Figure S3.</b> Autoradiograms show the electrophoretic mobility shift titration.....                                                                  | S8  |
| <b>Figure S4.</b> Denaturing PAGE analysis of the cross-linking reactions to obtain the rate constant ( <i>k</i> ) .....                                 | S8  |
| <b>Figure S5.</b> Denaturing PAGE analysis of the orthogonal crosslinking reaction by modular adaptors.....                                              | S9  |
| <b>Figure S6.</b> An illustration showing the shape and addresses of the DNA origami platform used in this study .....                                   | S10 |
| <b>Figure S7.</b> Michaelis-Menten plots for the phosphorylation of xylulose by XK AC-XK and AH-XK. ....                                                 | S10 |
| <b>Figure S8.</b> Effect of the DNA scaffold on the catalytic activity of XK .....                                                                       | S11 |
| <b>Figure S9.</b> Orthogonal assembly of three adaptor fused enzymes (ZS-XR, AC-XK and AH-XK) on DNA scaffold ...                                        | S12 |
| <b>Figure S10.</b> HPLC analysis for the determination of the amount of cofactors in the three enzyme cascade reaction ...                               | S13 |
| <b>Figure S11.</b> Comparison of the system with the first enzyme XR being loaded on the scaffold (I-4XR) and all enzymes in bulk solution. ....         | S14 |

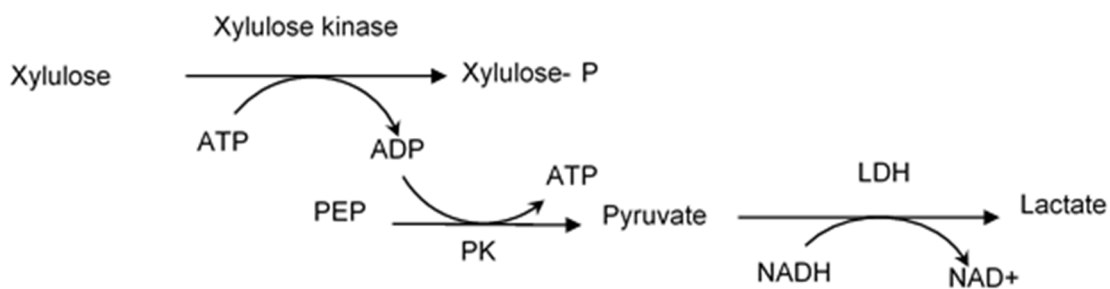

**Scheme S1.** Coupled enzyme assay for study the activity of XK derivatives.

**Table S1.** Equilibrium disassociation constants ( $K_D$ ) for the complexes of modular adaptors with ODNs.

| Modular Adaptors | $K_D$ (nM)  |               |
|------------------|-------------|---------------|
|                  | ODN-AZ      | ODN-ZF        |
| ZF-SNAP          | > 1000      | $63 \pm 18^*$ |
| AZ-SNAP          | $61 \pm 30$ | > 1000        |
| AZ-CLIP          | $65 \pm 2$  | > 1000        |
| AZ-Halo          | $118 \pm 6$ | > 1000        |

\*The value from ref 8.

**Table S2.** Kinetic parameters for the cross-linking reaction between 5'- $^{32}$ P-end-labeled ODN derivatives and modular adaptors.

| Rate constant $k$ ( $M^{-1}s^{-1}$ ) |           | Modular adaptors              |                             |                             |                             |
|--------------------------------------|-----------|-------------------------------|-----------------------------|-----------------------------|-----------------------------|
|                                      |           | ZF-SNAP                       | AZ-SNAP                     | AZ-CLIP                     | AZ-Halo                     |
| ODN derivatives                      | ODN-ZF-BG | $(3.8 \pm 1.2) \times 10^5^*$ | $(9.5 \pm 0.6) \times 10^4$ | $62 \pm 13$                 | n.d.                        |
|                                      | ODN-AZ-BG | $(2.6 \pm 0.2) \times 10^4$   | $(9.1 \pm 2.4) \times 10^5$ | $77 \pm 18$                 | n.d.                        |
|                                      | ODN-AZ-BC | $76 \pm 0.8$                  | $304 \pm 9$                 | $(5.0 \pm 0.7) \times 10^5$ | n.d.                        |
|                                      | ODN-AZ-CH | $55 \pm 11$                   | $147 \pm 25$                | $17 \pm 24$                 | $(4.0 \pm 1.0) \times 10^5$ |

\*The value from ref 8. n.d. : not detected.

**Table S3.** The staple strands including zif268 and AZP4 binding sites with substrates modified T ( $T^{BG}$ ,  $T^{CH}$ ,  $T^{BC}$  for T modified with BG, BC, and CH, respectively). The zif268 and AZP4 binding sites on the staple strands were colored in red and blue, respectively.

| Oligo name | Sequence (from 5' to 3')                                                                     |
|------------|----------------------------------------------------------------------------------------------|
| 5j-AZ-BC   | GCTGAGAGACAGACAA CTTATGCCACGTAGCGTT <sup>BC</sup> TTCGCTACGTGGCATAAG TATTTTAAACGCTCATGGAAATA |
| 8E-AZ-CH   | CTACTAA CTTATGCCACGTAGCGTT <sup>CH</sup> TTCGCTACGTGGCATAAG TGACCATTAGATACAACGAGTAGA         |
| 11D-ZF-BG  | AACAGGTC CTTACGCCACGCGCG TT <sup>BG</sup> TT CGCGCGTGGGCGTAAG GAACCAGACCGGAAGATTTCGAGC       |
| 24D-AZ-BC  | GGACAGAT CTTATGCCACGTAGCGTT <sup>BC</sup> TTCGCTACGTGGCATAAG AAATTGTGTCGAAATCTGTATCAT        |

**Table S4.** Total numbers and yields of the DNA scaffolds assembled with the modular adaptors or modular adaptor fused enzymes analyzed by AFM.

| DNA scaffold          | Modular adaptor derivatives  | Number of well-formed DNA scaffold | Numbers and yields of the modified cavities |           |            | Coassembly yield | AFM image                     |
|-----------------------|------------------------------|------------------------------------|---------------------------------------------|-----------|------------|------------------|-------------------------------|
|                       |                              |                                    | Cavity I                                    | Cavity II | Cavity III |                  |                               |
| I-1AH/II-1ZS/III-1AC  | AZ-Halo                      | 151                                | 145 [96%]                                   | 1 [1%]    | 4 [3%]     | n.a.             | Figure 3c                     |
|                       | ZF-SNAP                      | 179                                | 1 [1%]                                      | 166 [93%] | 5 [3%]     | n.a.             | Figure 3d                     |
|                       | AZ-CLIP                      | 147                                | 1 [96%]                                     | 5 [3%]    | 137 [93%]  | n.a.             | Figure 3e                     |
| I-1AH/II-1ZS/III-1AC  | AZ-Halo                      | 157                                | 155 [99%]                                   | 5 [3%]    | 6 [4%]     | n.a.             | Figure 4 1 <sup>st</sup> step |
|                       | AZ-Halo and ZF-SNAP          | 129                                | 125 [97%]                                   | 120 [93%] | 4 [3%]     | 118 [91%]        | Figure 4 2 <sup>nd</sup> step |
|                       | AZ-Halo, ZF-SNAP and AZ-CLIP | 101                                | 100 [99%]                                   | 92 [91%]  | 100 [99%]  | 92 [91%]         | Figure 4 3 <sup>rd</sup> step |
| I-1AH/II-1ZS/III-1AC  | AZ-Halo, ZF-SNAP and AZ-CLIP | 153                                | 153 [100%]                                  | 146 [95%] | 151 [98%]  | 142 [93%]        | Figure 5b                     |
|                       | AZ-Halo, ZF-SNAP and AZ-CLIP | 153                                | 149 [97%]                                   | 139 [91%] | 143 [93%]  | 133 [87%]        | Figure 5c                     |
| I-1AH/II-1ZS/III-1AC  | AH-XK                        | 142                                | 132 [93%]                                   | 1 [1%]    | 3 [2%]     | n.a.             | Figure S9b                    |
|                       | ZS-XR                        | 174                                | 2 [1%]                                      | 162 [93%] | 1 [1%]     | n.a.             | Figure S9c                    |
|                       | AC-XK                        | 163                                | 1 [1%]                                      | 3 [2%]    | 147 [90%]  | n.a.             | Figure S9d                    |
| I-4XR/II-4XDH/III-1XK | ZS-XR, G-XDH and AC-XK       | 151                                | 150 [99%]                                   | 126 [83%] | 147 [95%]  | 125 [83%]        | Figure 6d                     |
| I-4XR/II-4XDH/III-1XK | ZS-XR, G-XDH and AC-XK       | 167                                | 167 [100%]                                  | 10 [6%]   | 6 [4%]     | 144 [86%]        | Figure 6e                     |

n.a. : not applicable

**Table S5.** Kinetic parameters for XK, AC-XK and AH-XK for the phosphorylation of xylulose

|                                    | XK            | AC-XK          | AH-XK         |
|------------------------------------|---------------|----------------|---------------|
| $K_m$ for xylulose ( $\mu M$ )     | 203 $\pm$ 20  | 180 $\pm$ 21   | 223 $\pm$ 25  |
| $k_{cat}$ ( $s^{-1}$ )             | 257 $\pm$ 23  | 210 $\pm$ 15   | 240 $\pm$ 21  |
| $k_{cat}/K_m$ ( $mM^{-1}.s^{-1}$ ) | 1271 $\pm$ 55 | 1146 $\pm$ 194 | 1030 $\pm$ 84 |

**Table S6.** Quantitation of the cofactors by HPLC

| On the scaffold         | Scaffold name         | In bulk solution | ATP( $\mu$ M) | ADP( $\mu$ M) | NADH( $\mu$ M) | NAD <sup>+</sup> ( $\mu$ M) |
|-------------------------|-----------------------|------------------|---------------|---------------|----------------|-----------------------------|
| ZS-XR                   | I-4XR                 | G-XDH<br>AC-XK   | 587 $\pm$ 18  | 406 $\pm$ 21  | 73 $\pm$ 51    | 1910 $\pm$ 45               |
| ZS-XR<br>G-XDH          | I-4XR/II-4XDH         | AC-XK            | 557 $\pm$ 37  | 442 $\pm$ 37  | 132 $\pm$ 26   | 1867 $\pm$ 37               |
| ZS-XR<br>G-XDH<br>AC-XK | I-4XR/II-4XDH/III-1XK | -                | 522 $\pm$ 53  | 477 $\pm$ 52  | 116 $\pm$ 15   | 1883 $\pm$ 11               |
| ZS-XR<br>G-XDH          | I-4XR/I-4XDH          | AC-XK            | 510 $\pm$ 24  | 497 $\pm$ 29  | 81 $\pm$ 5     | 1921 $\pm$ 12               |
| ZS-XR<br>G-XDH<br>AC-XK | I-4XR/I-4XDH/I-1XK    | -                | 459 $\pm$ 8   | 542 $\pm$ 10  | 102 $\pm$ 6    | 1897 $\pm$ 10               |

**Table S7.** Amino acid sequences and molecular weights of modular adaptor derivatives.

| Derivatives | Amino acid sequence                                                                                                                                                                                                                                                                                                                                                                                                                                                                                                                                                                                                                                                                                                                                                                                                                                                                                                                                                                                                                                                                                              | calculated molecular weight (Da) |
|-------------|------------------------------------------------------------------------------------------------------------------------------------------------------------------------------------------------------------------------------------------------------------------------------------------------------------------------------------------------------------------------------------------------------------------------------------------------------------------------------------------------------------------------------------------------------------------------------------------------------------------------------------------------------------------------------------------------------------------------------------------------------------------------------------------------------------------------------------------------------------------------------------------------------------------------------------------------------------------------------------------------------------------------------------------------------------------------------------------------------------------|----------------------------------|
| AZ-SNAP     | MKTGEKRPYACPVESCDRRFSQSNDLTRHIRIHTGQKPFQCRICMRNFSRSDSLTRHIRTHTGEKPFAC<br>DICGRKFAESDNRKTHTKIHTGEKEFGGSGGSMKDKCEMKRTTLDSPGKLELSGCEQGLHEIIFLGKG<br>TSAADAVEVPAPAAVLGGPEPLMQATAWLNAYFHQPEAIEEFVFPALHHPVFQQESFTRQVLWKLKVV<br>KFGEVISYSHLALAGNPAATAAVKTALSGNPVPIILPCHRVVQGDLDVGGYEGGLAVKEWLLAHEGHR<br>LGKPGLGGGSGGSHHHHHH                                                                                                                                                                                                                                                                                                                                                                                                                                                                                                                                                                                                                                                                                                                                                                                             | 32,181                           |
| AZ-CLIP     | MKTGEKRPYACPVESCDRRFSQSNDLTRHIRIHTGQKPFQCRICMRNFSRSDSLTRHIRTHTGEKPFAC<br>DICGRKFAESDNRKTHTKIHTGEKEFGGSGGSMKDKCEMKRTTLDSPGKLELSGCEQGLHRIIFLGKG<br>TSAADAVEVPAPAAVLGGPEPLIQATAWLNAYFHQPEAIEEFVFPALHHPVFQQESFTRQVLWKLKVV<br>KFGEVISESH LALVGNPAATAAVNTALDGNPVPILIPCHRVVQGDSVGPYLGGLAVKEWLLAHEGHR<br>LGKPGLGGGSGGSHHHHHH                                                                                                                                                                                                                                                                                                                                                                                                                                                                                                                                                                                                                                                                                                                                                                                             | 32,196                           |
| AZ-Halo     | MKTGEKRPYACPVESCDRRFSQSNDLTRHIRIHTGQKPFQCRICMRNFSRSDSLTRHIRTHTGEKPFAC<br>DICGRKFAESDNRKTHTKIHTGEKEFGGSGGSMKDKCEMKRTTLDSPGKLELSGCEQGLHRIIFLGKG<br>LHGNPTSSYVWRNIIPHVAPTHRCIAPDLIGMGKSDKPDLYFFDDHVRFMDAFIEALGLEEVVLIHID<br>WGSALGFHWAKRNPVKGIAFMEFIRPIPTWDEWPEFARETQAFRTTDVGRKLIIDQNVFIEGTLPM<br>GVVRPLTEVEMDHYREPFLNPVDREPLWRFPNELPIAGEPANIVALVEEYMDWLHQSPVPKLLFWGTPG<br>VLIPPAEAARLAKSLPNCKAVDIGPGLNLLQEDNPDIGSEIARWLSTLEISGEPTTEDLYFQSDNAIA<br>HHHHHH                                                                                                                                                                                                                                                                                                                                                                                                                                                                                                                                                                                                                                                           | 47,768                           |
| AC-XK       | MKTGEKRPYACPVESCDRRFSQSNDLTRHIRIHTGQKPFQCRICMRNFSRSDSLTRHIRTHTGEKPFAC<br>DICGRKFAESDNRKTHTKIHTGEKEFGGSGGSMKDKCEMKRTTLDSPGKLELSGCEQGLHRIIFLGKG<br>TSAADAVEVPAPAAVLGGPEPLIQATAWLNAYFHQPEAIEEFVFPALHHPVFQQESFTRQVLWKLKVV<br>KFGEVISESH LALVGNPAATAAVNTALDGNPVPILIPCHRVVQGDSVGPYLGGLAVKEWLLAHEGHR<br>LGKPGLGGGSGGSM LCSVQRQTREVSNTMSLDSYYLGFDLSTQQLKCLAINQDLKIVHSETVEFEKDL<br>PHYHTKKGVYIHGDTIECPVAMWLEALDLVLSKYREAKFPLNKVMAVSGSCQQHGSVYWSSQAESLLEQ<br>LNKKPEKDLLHYVSSVAFARQTAPNWQDHSTAKQCQEFEECIGGPEKMAQLTGSRAHFRFTGPQILKIA<br>QLEPEAYEKT KTISLVSNFLTSLVGHVLEEEADACGMNLYDIRERKFSDELLHLIDSSSKDKTIRQK<br>LMRAPMKNLIAGTICKYFIEKYGFNTNCKVSPMTGDNLATICSPLRKNDVLVSLGTSTTVLLVTDKYH<br>PSPNYHLFIHPTLPNHYMGMICYCNGLARERIRDELNKERENNYEKTNDWTLFNQAVLDDSESENEL<br>GVYFPLGEIVPSVKAINKRVIFNPKTGMIEREVAKFKDKRHDKNIVESQALSCRVRISPLSDSNASS<br>QQRNLNEDTIVKFDYDESPDRDYLNKRPERTFFVGGASKNDIAIVKKFAQVIGATKGNFRLETPNSCALGG<br>CYKAMWSLLYDSNKIAVPFDKFLNDNFPWHVMESISDVNDENWDRYNSKIVPLSELEKT LIGGSGGSHH<br>HHHH                                                                                                                              | 100,901                          |
| AH-XK       | MKTGEKRPYACPVESCDRRFSQSNDLTRHIRIHTGQKPFQCRICMRNFSRSDSLTRHIRTHTGEKPFAC<br>DICGRKFAESDNRKTHTKIHTGEKEFGGSGGSMKDKCEMKRTTLDSPGKLELSGCEQGLHRIIFLGKG<br>LHGNPTSSYVWRNIIPHVAPTHRCIAPDLIGMGKSDKPDLYFFDDHVRFMDAFIEALGLEEVVLIHID<br>WGSALGFHWAKRNPVKGIAFMEFIRPIPTWDEWPEFARETQAFRTTDVGRKLIIDQNVFIEGTLPM<br>GVVRPLTEVEMDHYREPFLNPVDREPLWRFPNELPIAGEPANIVALVEEYMDWLHQSPVPKLLFWGTPG<br>VLIPPAEAARLAKSLPNCKAVDIGPGLNLLQEDNPDIGSEIARWLSTLEISGEPTTEDLYFQSDNAIA<br>MLCSVQRQTREVSNTMSLDSYYLGFDLSTQQLKCLAINQDLKIVHSETVEFEKDLPHYHTKKGVYIHG<br>DTIECPVAMWLEALDLVLSKYREAKFPLNKVMAVSGSCQQHGSVYWSSQAESLLEQLNKKPEKDLLHYV<br>SSVAFARQTAPNWQDHSTAKQCQEFEECIGGPEKMAQLTGSRAHFRFTGPQILKIAQLEPEAYEKT KT<br>ISLVSNFLTSLVGHVLEEEADACGMNLYDIRERKFSDELLHLIDSSSKDKTIRQKLMRAPMKNLIAGT<br>ICKYFIEKYGFNTNCKVSPMTGDNLATICSPLRKNDVLVSLGTSTTVLLVTDKYHPSPNYHLFIHPTL<br>PNHYMGMICYCNGLARERIRDELNKERENNYEKTNDWTLFNQAVLDDSESENELGVYFPLGEIVPSV<br>KAINKRVIFNPKTGMIEREVAKFKDKRHDKNIVESQALSCRVRISPLSDSNASSQQRNLNEDTIVKFD<br>YDESPDRDYLNKRPERTFFVGGASKNDIAIVKKFAQVIGATKGNFRLETPNSCALGGCYKAMWSLLYDSN<br>KIAVPFDKFLNDNFPWHVMESISDVNDENWDRYNSKIVPLSELEKT LIGGSGGSHHHHHH | 116,473                          |

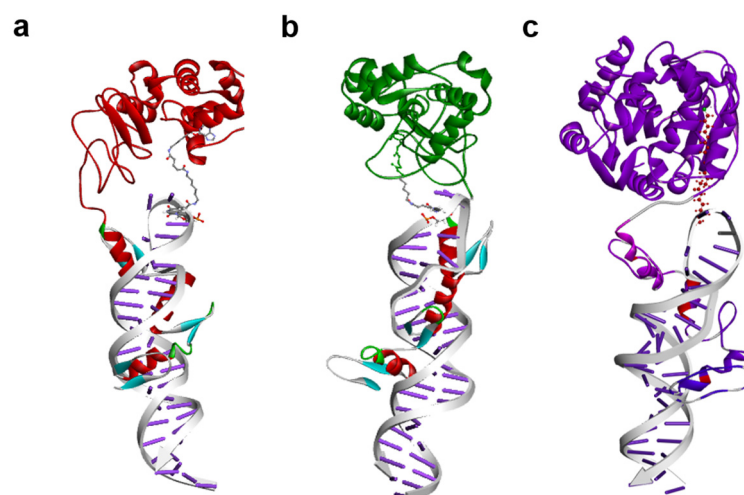

**Figure S1.** Possible models for the complex of (a) AZ-SNAP with ODN-AZ-BG, (b) AZ-CLIP with ODN-AZ-BC, (c) AZ-Halo with ODN-AZ-CH, respectively, based on the crystal structure of the complex between zif268 and ODN (PDB ID : 1ZAA) and the complex of SNAP-tag with BG (PDB ID:3KZY), and Halo-tag with CH (PDB ID : 1CQW). The models were constructed by using Discovery Studio (version 3.1, Accelrys Inc.).

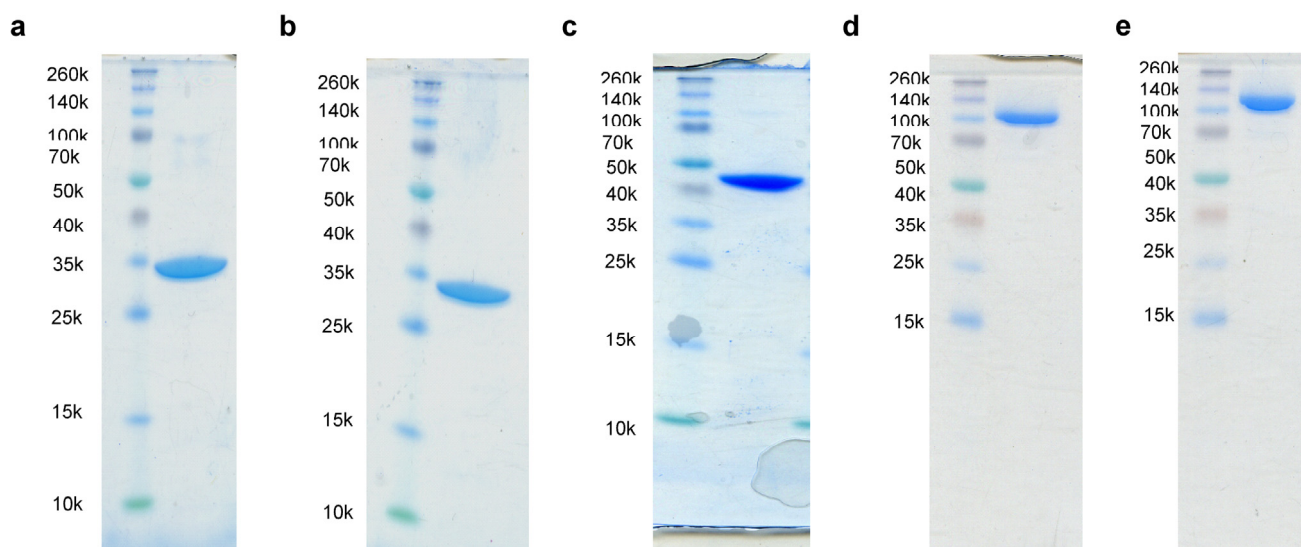

**Figure S2.** SDS-PAGE analyses of purified modular adaptors and modular adaptor-fused enzymes. (a) AZ-SNAP, (b) AZ-CLIP, (c) AZ-Halo, (d) AC-XK, (e) AH-XK. Amino acid sequences and molecular weights of these proteins are shown in Table S7.

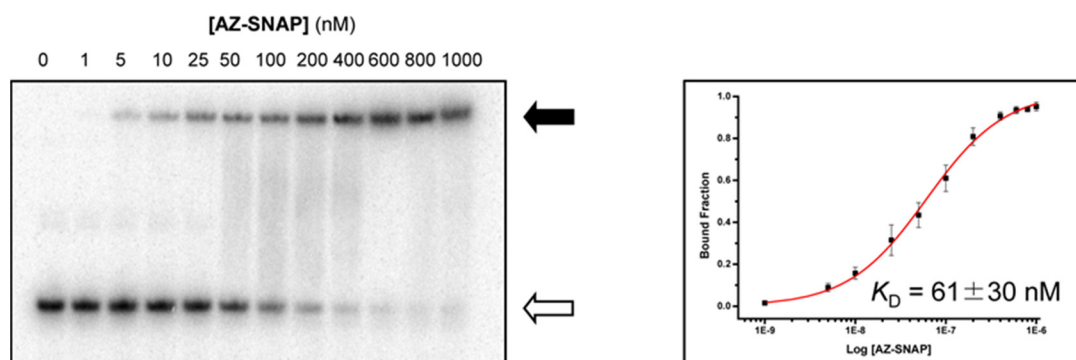

**Figure S3.** An autoradiogram shows the electrophoretic mobility shift titration of AZ-SNAP to ODN-AZ in a buffer (pH 8.0) containing 40 mM Tris-HCl, 20 mM acetic acid, 12.5 mM  $\text{MgCl}_2$ , 1mM DTT,  $1\mu\text{M}$   $\text{ZnCl}_2$  0.02 % Tween 20, and 200 nM BSA at ambient temperature (left). Open arrow and filled arrow denote free ODN-AZ and AZ-SNAP bound ODN-AZ, respectively. A semilogarithmic plot shows the fractions of 5'- $^{32}\text{P}$ -labeled ODN-AZ bound to AZ-SNAP (right). An equilibrium dissociation constant obtained is listed in Table S1.

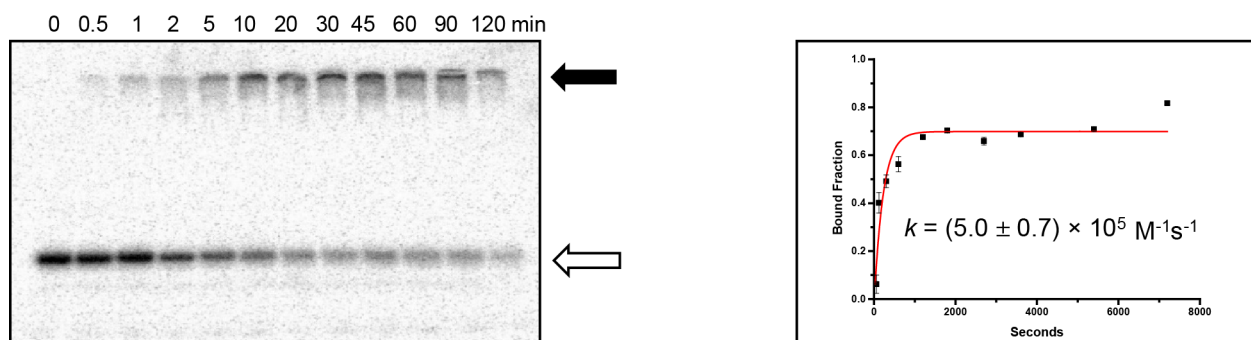

**Figure S4.** An autoradiogram shows denaturing gel electrophoretic analysis of the cross-linking reactions of 5'- $^{32}\text{P}$ -end-labeled ODN-AZ-BC with AZ-CLIP (10 nM) (left). Open arrow and filled arrow denote ODN-AZ-BC and AZ-CLIP bound ODN-AZ-BC, respectively. A time-course plot for the crosslinking reaction of ODN-AZ-BC and AZ-CLIP to obtain the rate constant ( $k$ ) (right). The determined rate constant is listed in Table S2.

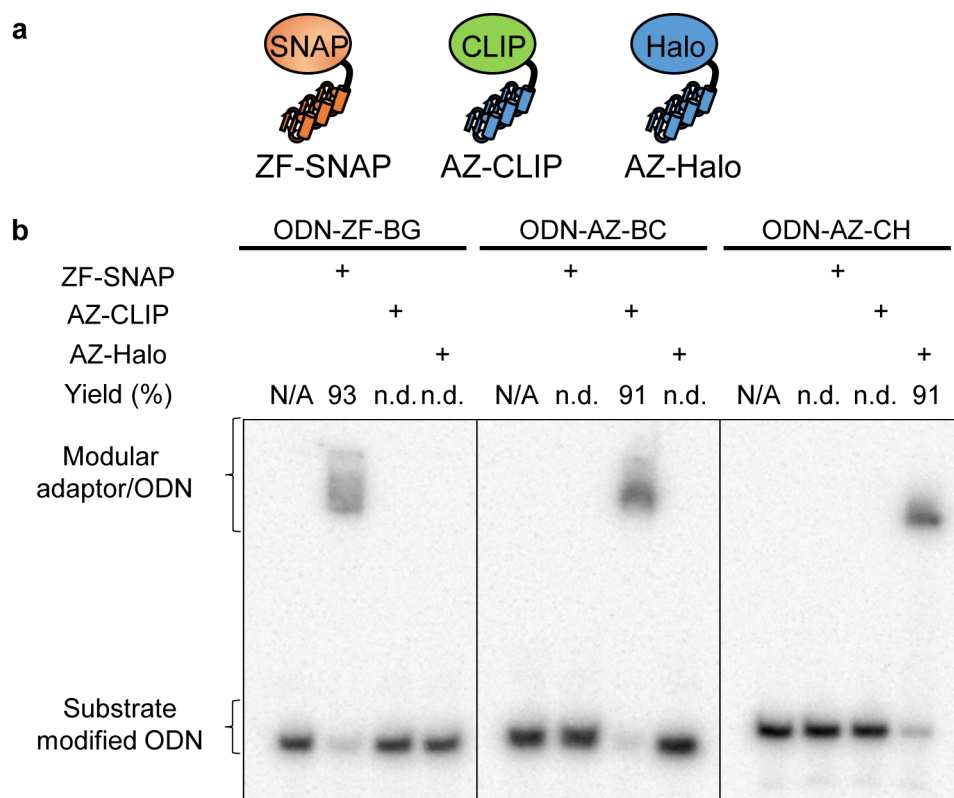

**Figure S5.** (a) Combination of modular adaptors to validate their orthogonal reactions to target sites. (b) Denaturing PAGE analyses of the crosslinking reaction by modular adaptors (ZF-SNAP, AZ-CLIP and AZ-Halo) and the substrate modified ODN (ODN-ZF-BG, ODN-AZ-BC, and ODN-AZ-CH), respectively. Each 5'-<sup>32</sup>P-end-labeled ODN (ODN-ZF-BG, ODN-AZ-BC or ODN-AZ-CH) was incubated with a modular adaptor (100 nM : ZF-SNAP, AZ-CLIP or AZ-Halo) for 30 min in a buffer (pH 8.0) containing 40 mM Tris-HCl, 20 mM acetic acid, 12.5 mM MgCl<sub>2</sub>, 1 mM DTT, 1 μM ZnCl<sub>2</sub>, 0.02% Tween 20, 200 nM BSA and 100 nM calf thymus DNA at ambient temperature. N/A : not applicable, n.d: not detectable.

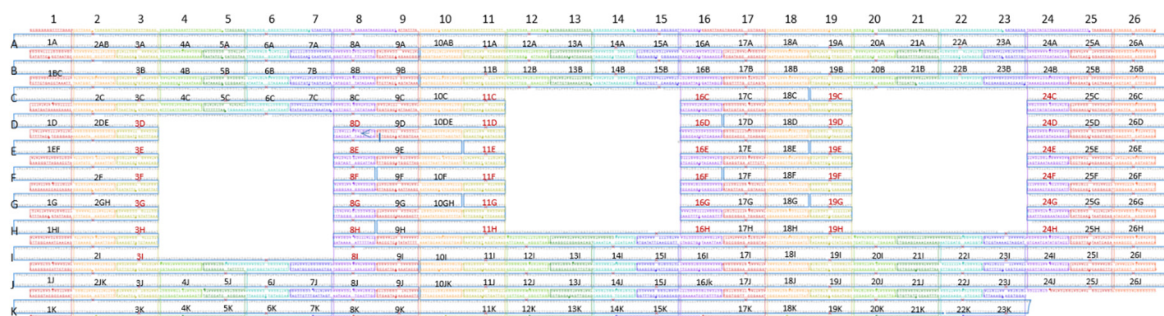

**Figure S6.** An illustration shows the shape and addresses of the DNA origami scaffold used in this study. Nucleotide sequences of all staple strands were shown in previous report<sup>11</sup> and Table S3.

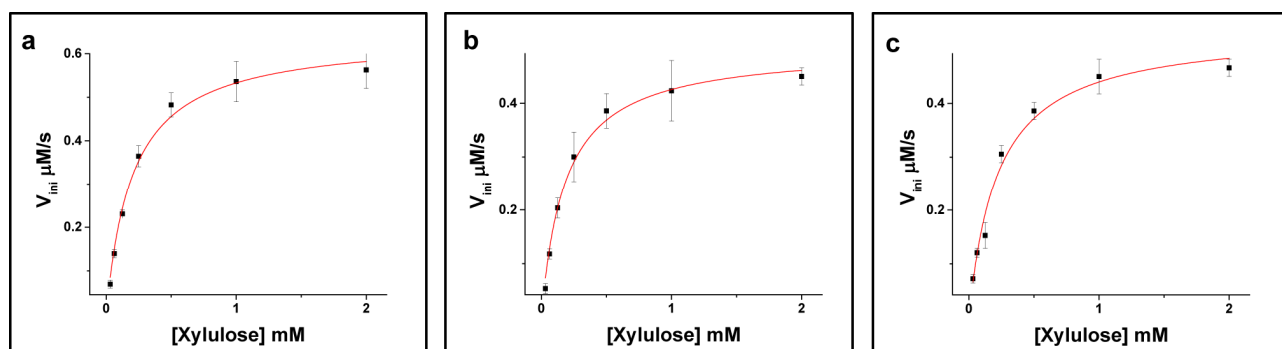

**Figure S7.** Michaelis-Menten plots for the phosphorylation of xylulose by (a) XK, (b) AC-XK, or (c) AH-XK. Enzymatic reactions with the same concentration of enzyme (2 nM) were performed at 25 °C in a buffer (pH 8.0) containing 40 mM Tris-HCl, 20 mM acetic acid, 12.5 mM MgCl<sub>2</sub>, 1 mM DTT, 1 μM ZnCl<sub>2</sub>, 0.02% Tween20, 100 mM NaCl, 1.1 mM ATP, 0.2 mM NADH, 2.3 mM Phosphoenolpyruvate, 4.8 U/ml PK and 4.5 U/ml LDH, and the indicated concentration of xylulose (0.03 to 2mM). The reaction was started by an addition of xylulose.

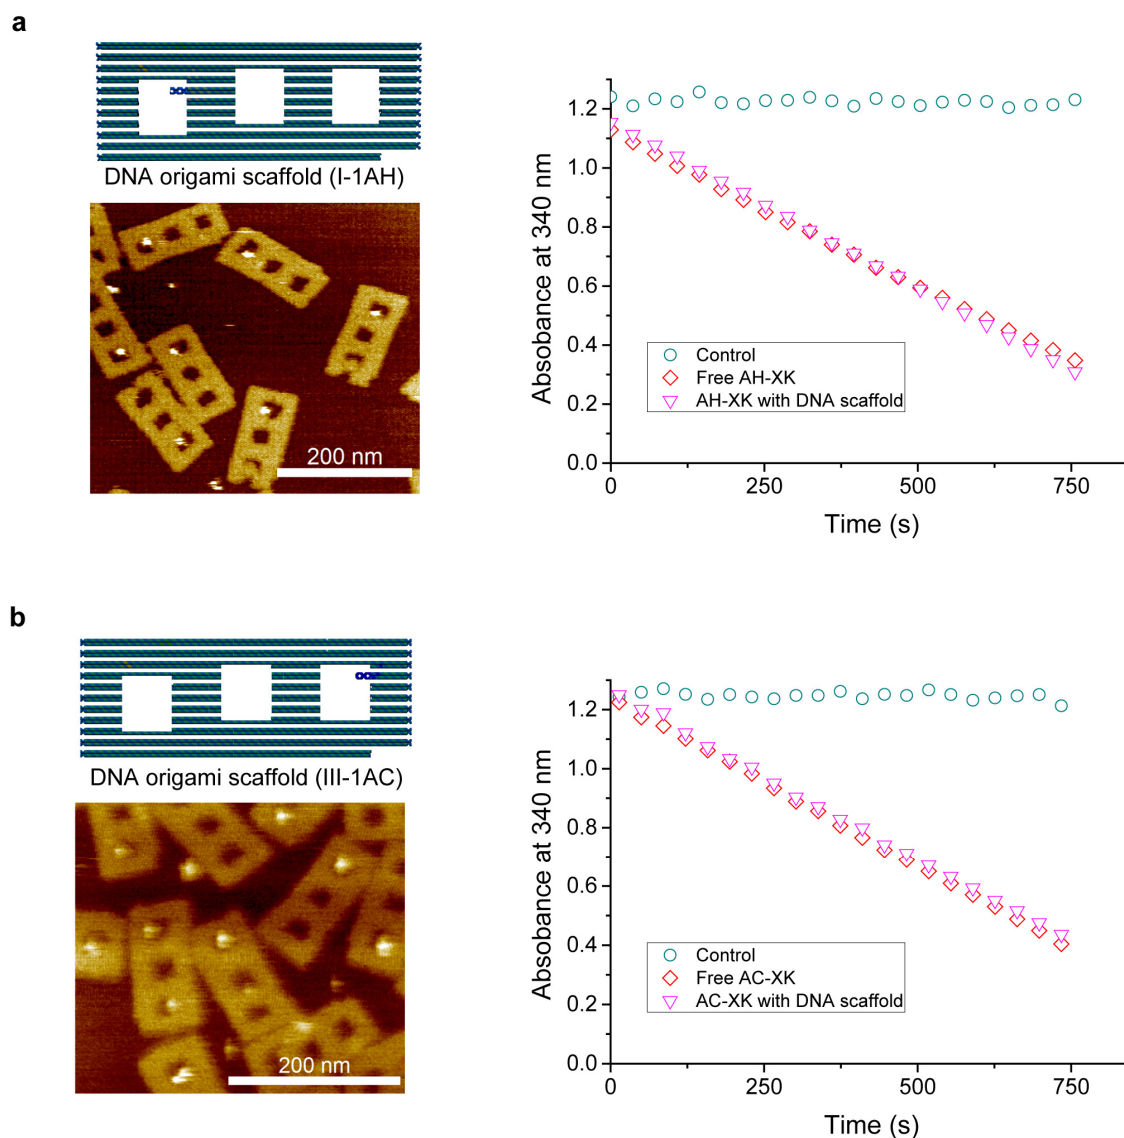

**Figure S8.** Effect of the DNA scaffold on the catalytic activity of XK. (a) An illustration of the DNA scaffold holding a binding site modified by CH (for AH-XK) and an AFM image of AH-XK bound on the DNA scaffold (left). Time-course profiles of the oxidation of NADH monitored by absorbance at 340 nm (right). (b) An illustration of the DNA scaffold holding a binding site modified by BC (for AC-XK) and an AFM image of AC-XK bound on the DNA scaffold (left). Time-course profiles of the oxidation of NADH monitored by absorbance at 340 nm (right).

Enzyme assay was carried out in a solution containing AH-XK or AC-XK in the absence (Free AH-XK or Free AC-XK, red diamonds) or presence of the DNA scaffold (AH-XK with the DNA scaffold or AC-XK with the DNA scaffold, pink triangles). Prior to the assay for XK activity, 2 nM AH-XK (or AC-XK) was incubated with or without 10 nM DNA scaffold for 30 minutes on ice in a buffer (pH 7.6) containing 40 mM Tris-HCl, 20 mM acetic acid, 12.5 mM MgCl<sub>2</sub>, 1 mM DTT, 1  $\mu$ M ZnCl<sub>2</sub>, and 0.02% Tween20. Enzyme reactions were carried out with the same enzyme concentration (1 nM) at 25 °C in a buffer (pH 7.6) containing 100 mM NaCl, 1.1 mM ATP, 0.2 mM NADH, 2.3 mM PEP, 4.8 U/ml PK and 4.5 U/ml LDH. The reactions were started by the addition of 2 mM xylulose.

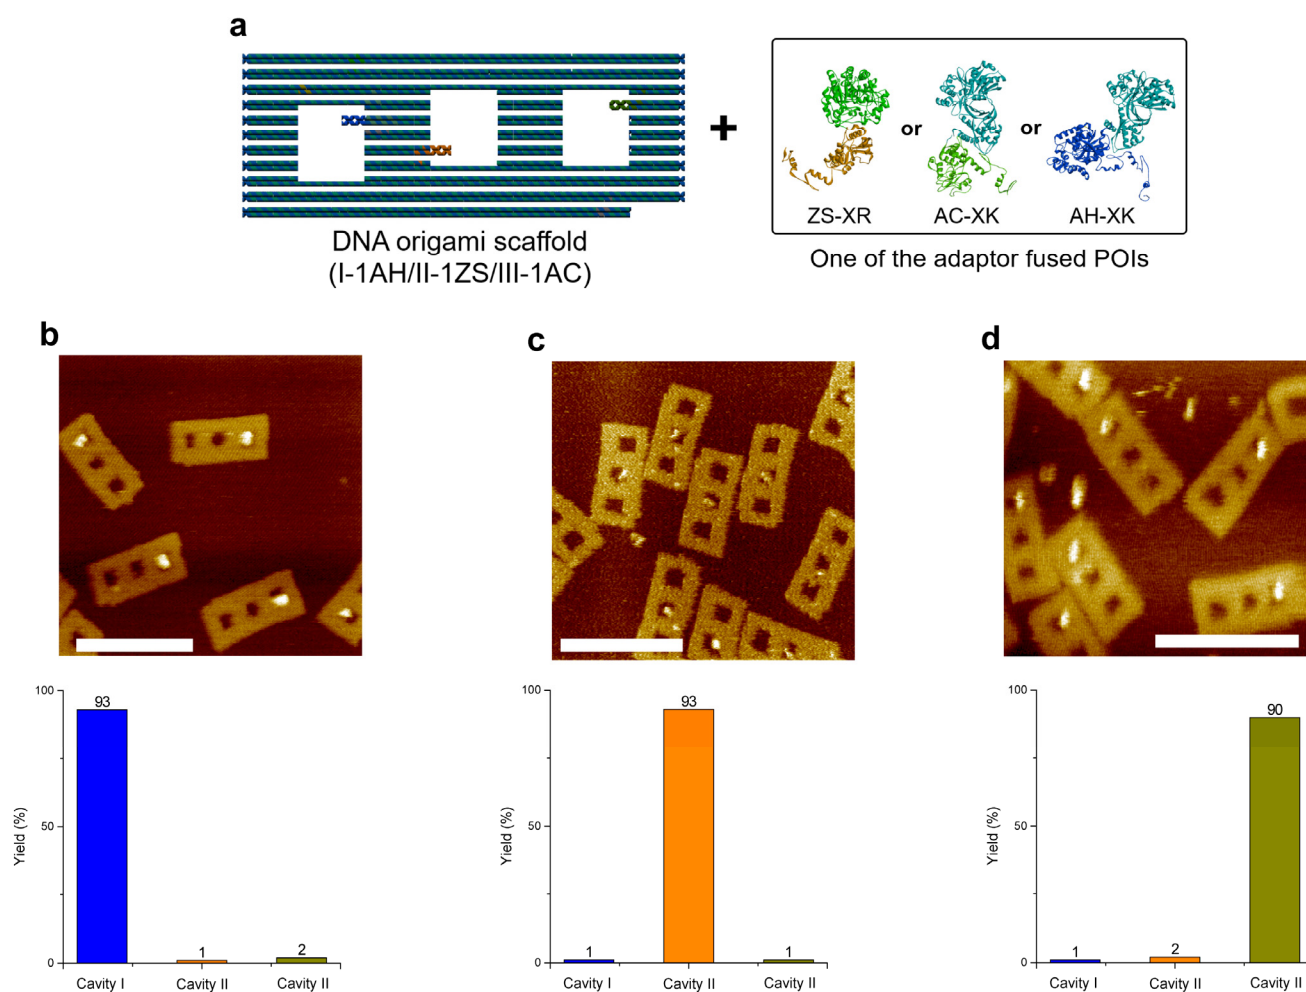

**Figure S9.** (a) An illustration of orthogonal assembly of three adaptor fused POIs (ZS-XR, AC-XK, AH-XK). (b-d) AFM images and binding yield of (b) AH-XK, (c) ZS-XR, and (d) AC-XK on the DNA scaffold (I-1AH/II-1ZS/III-1AC), respectively. 5 nM of DNA scaffold was incubated with 5 molar equivalent of AH-XK, ZS-XR or AC-XK for 30 minutes on ice in a buffer (pH 8.0) containing 40 mM Tris-HCl, 20 mM acetic acid, 12.5 mM MgCl<sub>2</sub>, 1 mM DTT, 1  $\mu$ M ZnCl<sub>2</sub> and 0.02% Tween20. Crosslinking yields were estimated by counting the number of cavities occupied by the modular adaptors (Table S7). Scale bars represent 200 nm.

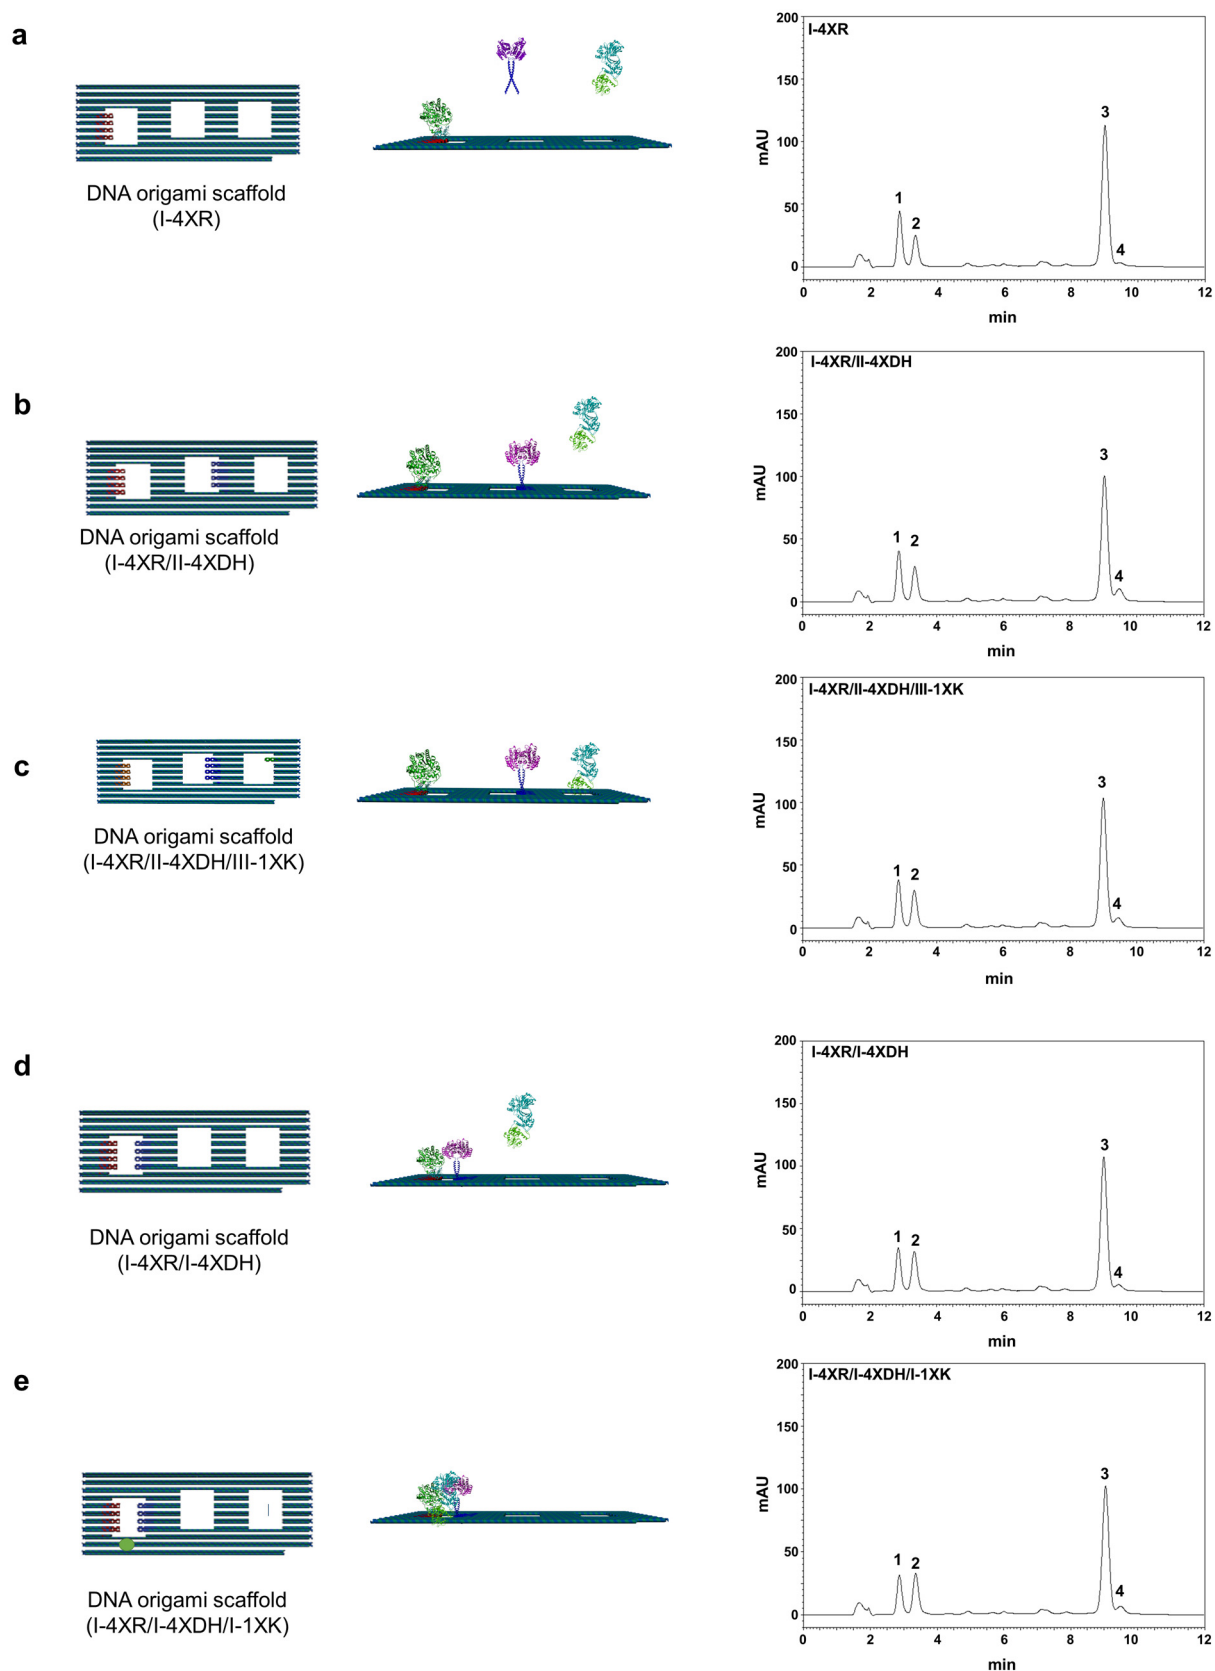

**Figure S10.** HPLC analyses (detected by UV at 260 nm) of cofactors in the three enzyme cascade reaction. Peaks 1, 2, 3 and 4 indicated ATP, ADP,  $\text{NAD}^+$  and NADH, respectively. The analyses were carried out with the reaction mixture incubated for 24 hours (a) with ZS-XR located on the scaffold (I-4XR) and G-XDH and

AC-XK in bulk solution, (b) with ZS-XR and G-XDH located on the scaffold (I-4XR/I-4XDH) and AC-XK in bulk solution, (c) ZS-XR, G-XDH and AC-XK located on the scaffold (I-4XR/I-4XDH/I-1XK), (d) with ZS-XR and G-XDH located on the scaffold (I-4XR/II-4XDH) and AC-XK in bulk solution, and (e) ZS-XR, G-XDH and AC-XK located on the scaffold (I-4XR/II-4XDH/III-1XK), respectively. Each reaction mixture for (a)-(e) contained 26 nM ZS-XR, 26 nM G-XDH and 6.5 nM AC-XK in a buffer (pH 7.0) containing 40 mM Tris-HCl, 20 mM acetic acid, 12.5 mM MgCl<sub>2</sub>, 1 mM DTT, 1  $\mu$ M ZnCl<sub>2</sub>, 0.02% Tween20, 2 mM NADH and 1 mM ATP. Reaction was started by an addition of 200 mM xylose.

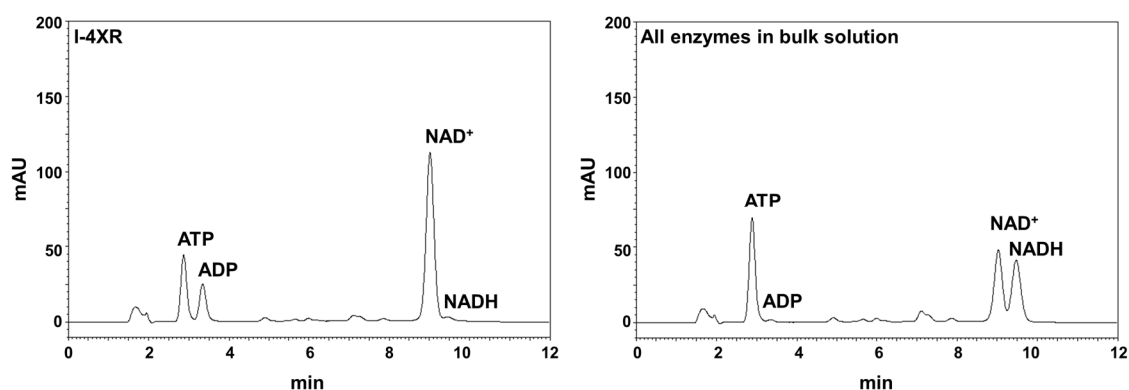

**Figure S11.** Comparison of the system with the first enzyme XR being loaded on the scaffold (I-4XR) and the one with all enzymes in bulk solution. HPLC analyses (detected by UV at 260 nm) of cofactors in the three-enzyme cascade reaction. The analyses were carried out with the reaction mixture incubated for 24 hours (a) with ZS-XR located on the scaffold (I-4XR) and G-XDH and AC-XK in the bulk solution and (b) ZS-XR, G-XDH and AC-XK in the bulk solution, respectively. Each reaction mixture contained 26 nM ZS-XR, 26 nM G-XDH and 6.5 nM AC-XK in a buffer (pH 7.0) containing 40 mM Tris-HCl, 20 mM acetic acid, 12.5 mM MgCl<sub>2</sub>, 1 mM DTT, 1  $\mu$ M ZnCl<sub>2</sub>, 0.02% Tween20, 2 mM NADH and 1 mM ATP. Reaction was started by an addition of 200 mM xylose.

**Discussion :** In the cascade reaction by the three enzymes, the system with the first enzyme XR being loaded on the scaffold (I-4XR) was more efficient than the reaction system with all enzymes being free in the solution as shown in Figure S11, where "I-4XR" produced more ADP than "All enzymes in bulk solution". The result indicated that XR could be more stable on the DNA scaffold than in the bulk solution because the consumption of NADH was also lower in the case of "All enzymes in bulk solution". The stability of XDH and XK was similar on the DNA scaffold and in the bulk solution (data not shown). Using the system with all enzymes being free in solution as a control experiment would overestimate the actual spatial effect of assembly for three enzymes. Therefore, we considered that the system with XR being loaded on the DNA scaffold would be an appropriate control experiment.
